# Supplementary material
Source: publisher figshare collection journal article supplement (https://frontiersin.figshare.com/ndownloader/files/15670136)
Supplement: Supplementary file 1 [file 15670136]

**Clark solution**

The coupons specimens were removed from the corrosive media and immersed in the Clark solution. For WL, the coupons were pickled in pickling solution (1 l of water containing 500 mL of hydrochloric acid) at room temperature for 25 min. rinsed with water, cleaned with acetone, dried in hot air and finally weighed. The mean of weight loss values of three identical specimens was used to Calculate the average WL and CR were calculated following standard method.

***NACE RP-07-75, Preparation, Installation, Analysis and Interpretation of Corrosion Coupons in Oilfield Operations, 2005.***
